# Supplementary material for: Redefining nitric oxide production in legume nodules through complementary insights from electron paramagnetic resonance spectroscopy and specific fluorescent probes
Source: PubMed Central journal article supplement (PMC6022593; doi:10.1093/jxb/ery159), 2018-04-26
Supplement: ery159_suppl_supplementary_figures.pdf [file ery159_suppl_supplementary_figures.pdf]

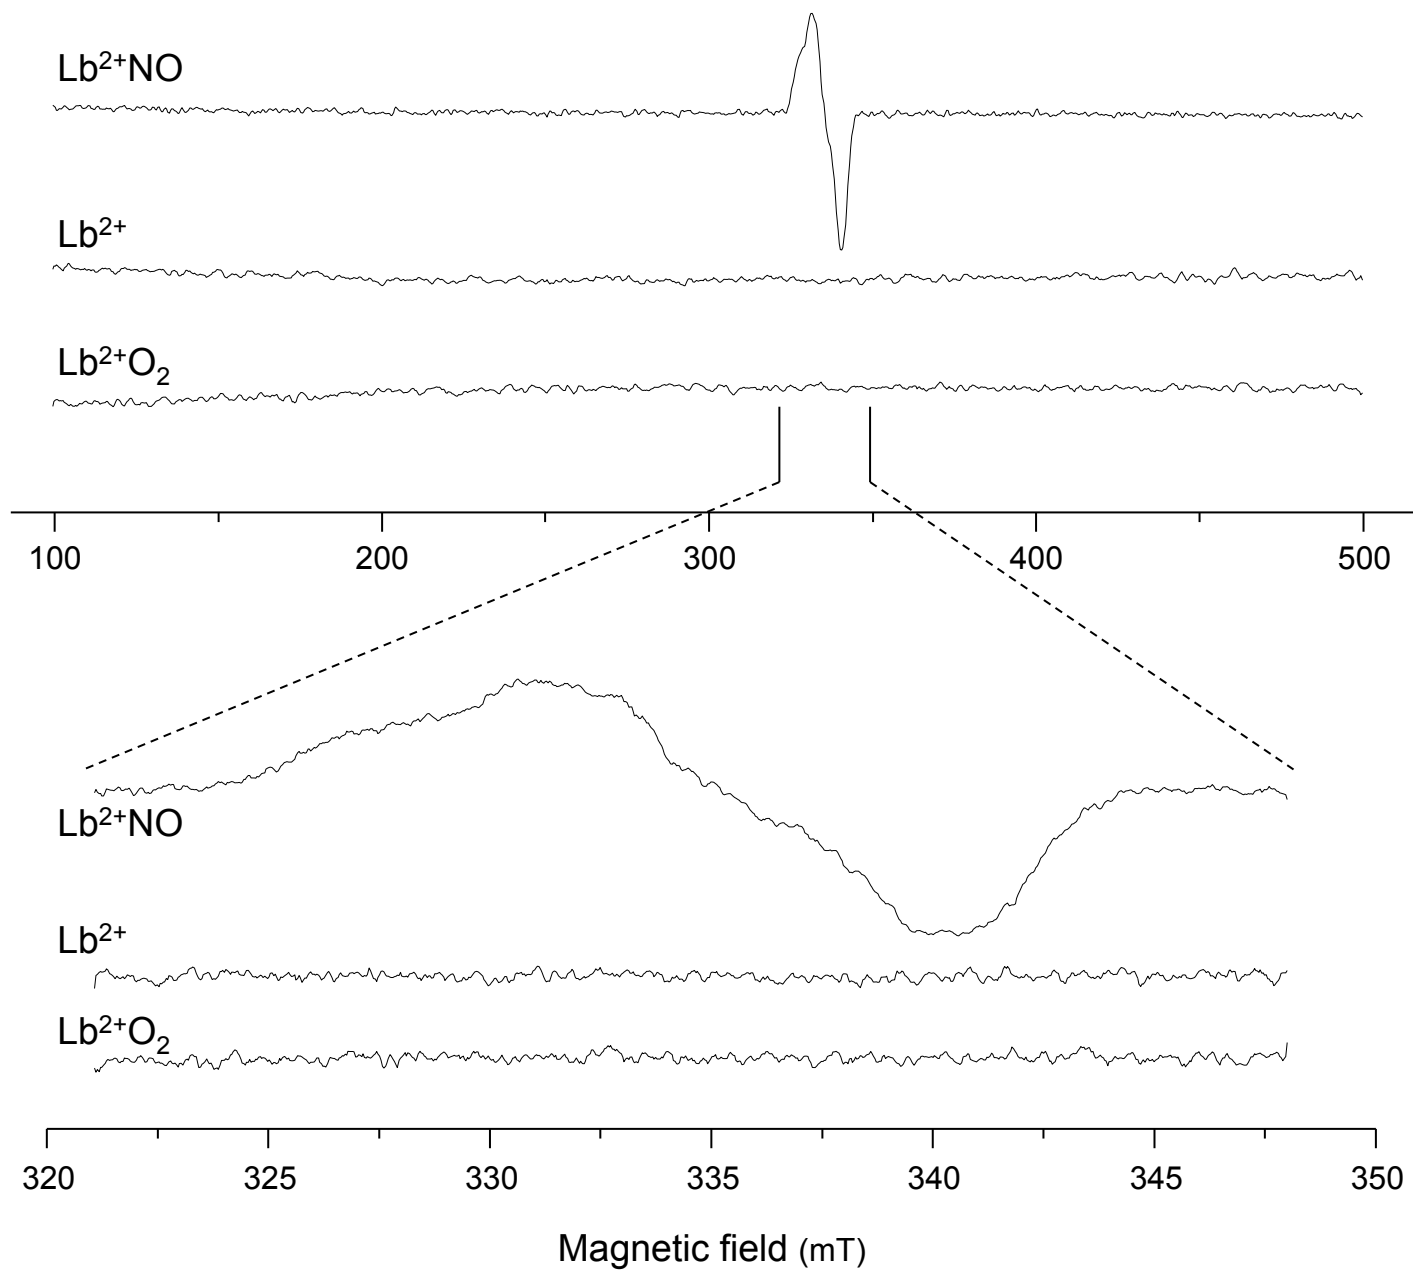

**Figure S1. EPR spectra of purified soybean Lba in different oxidation and ligand-binding states.** The spectra are shown in two ranges of magnetic field.

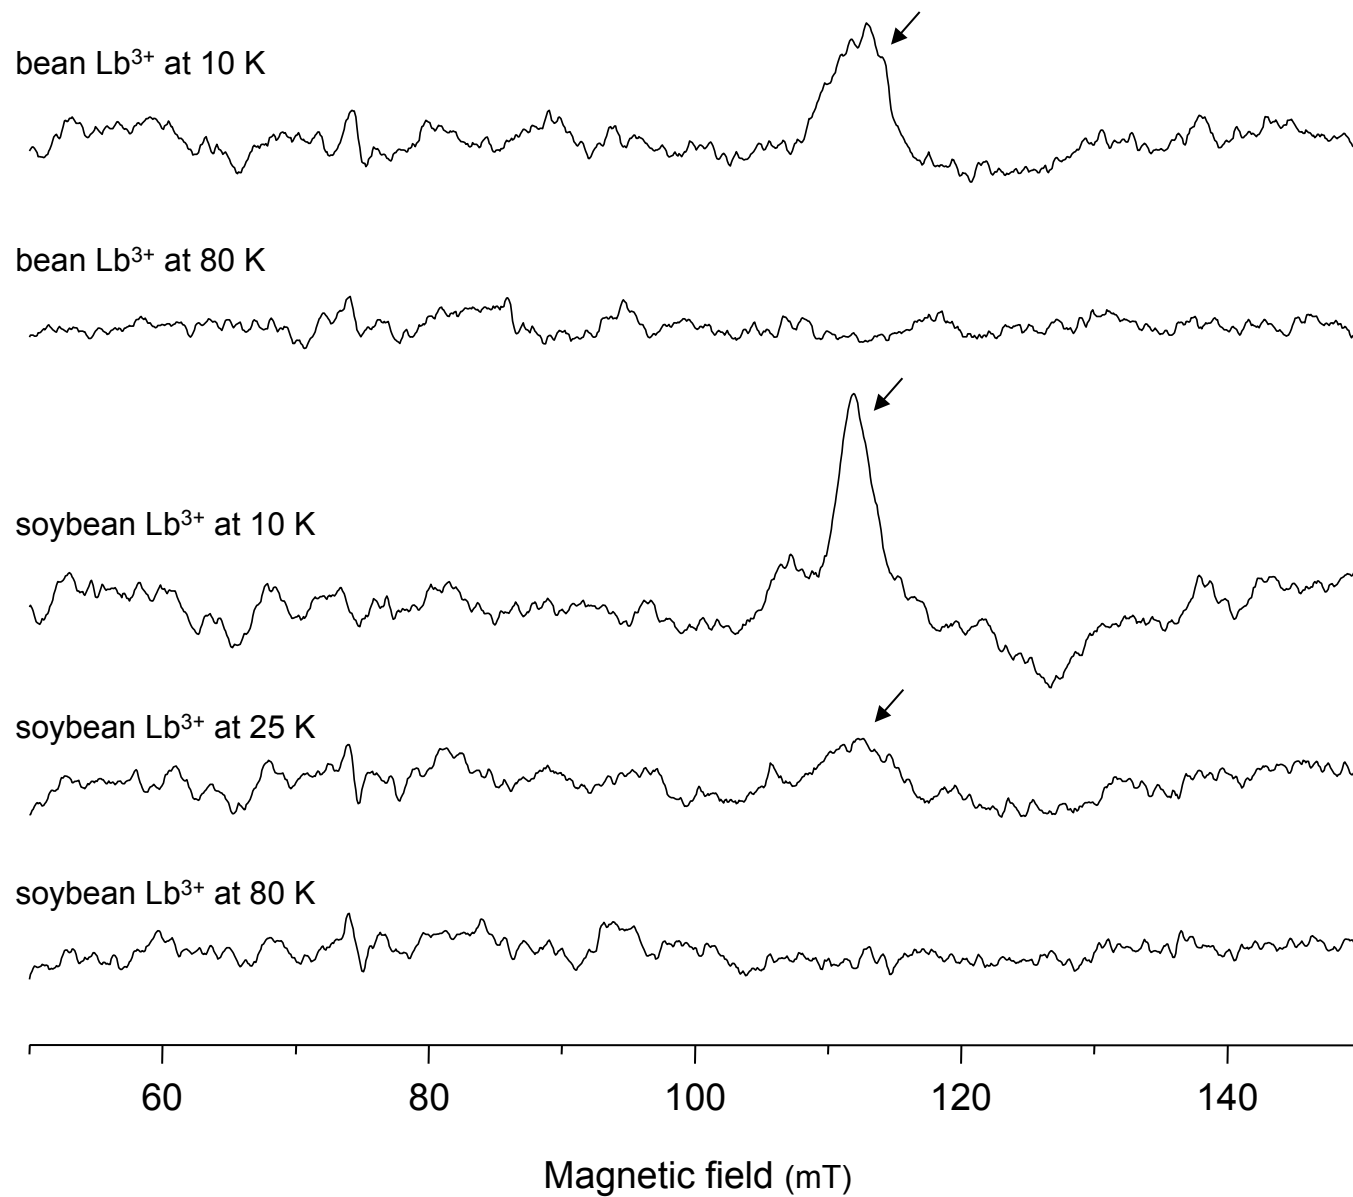

**Figure S2. EPR spectra of bean  $Lb^{3+}$  and soybean  $Lba^{3+}$  at different temperatures. Arrows indicate the diagnostic peaks.**

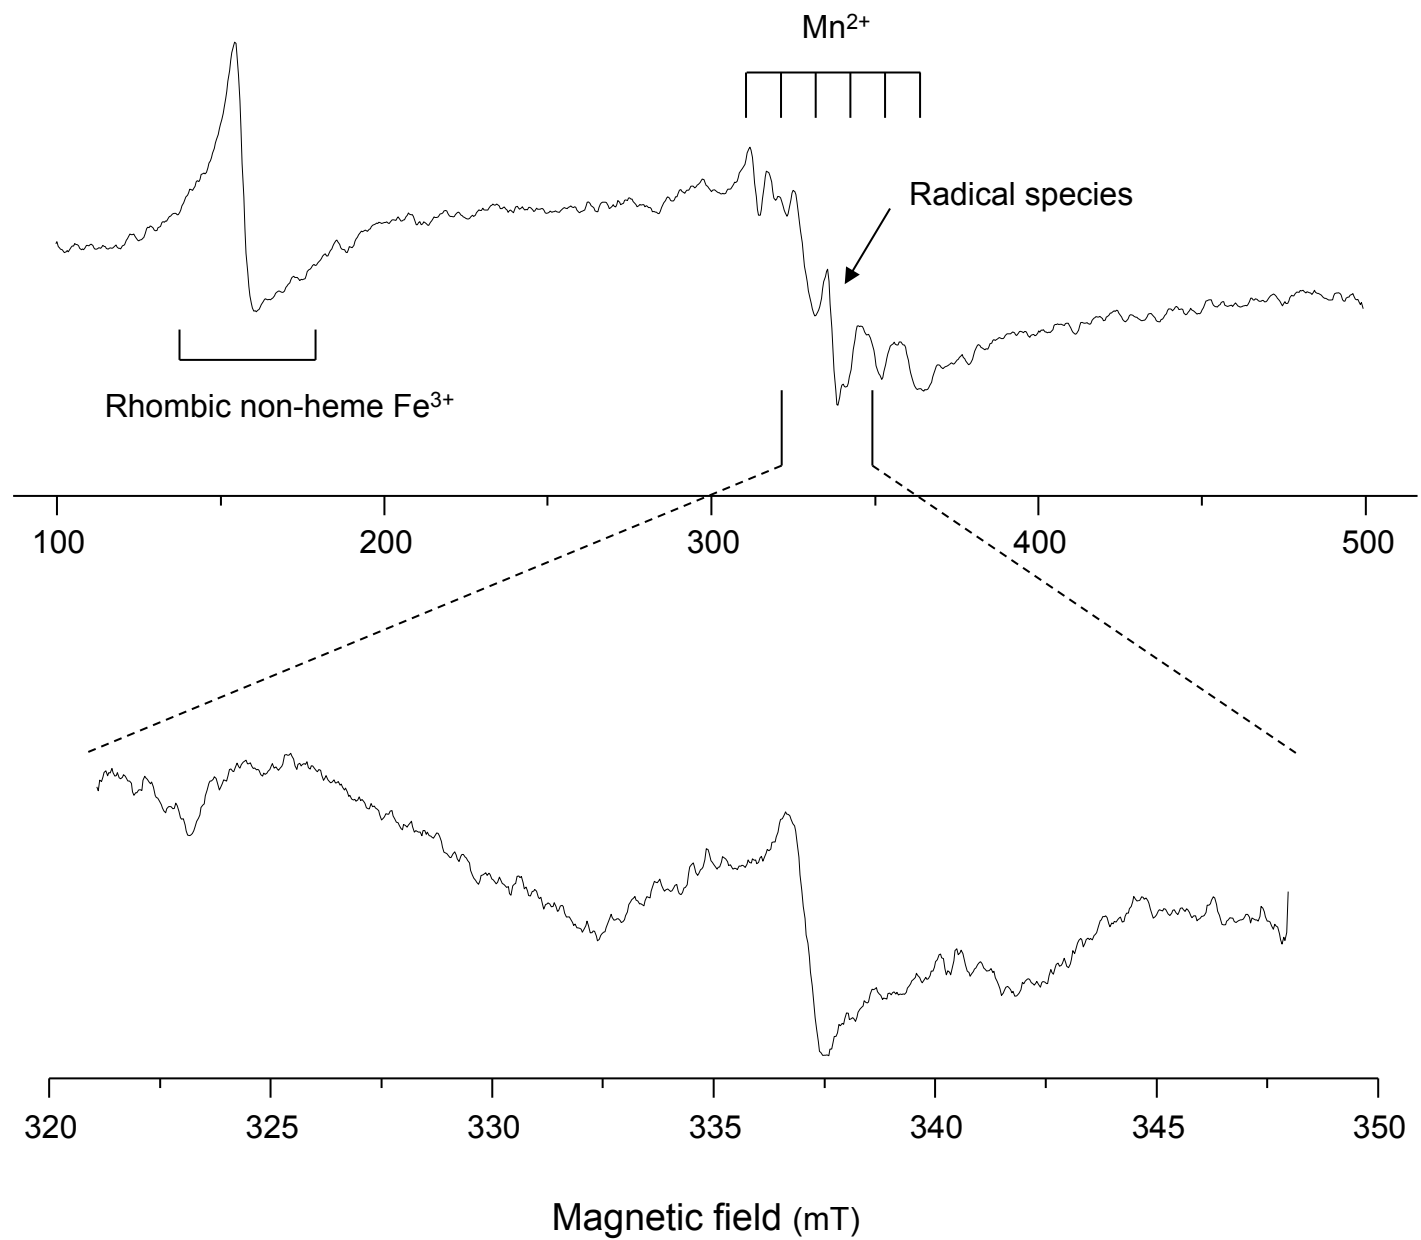

**Figure S3. EPR spectrum of intact bean nodules showing the signals corresponding to rhombic non-heme Fe<sup>3+</sup>, Mn<sup>2+</sup>, and organic radical species.**

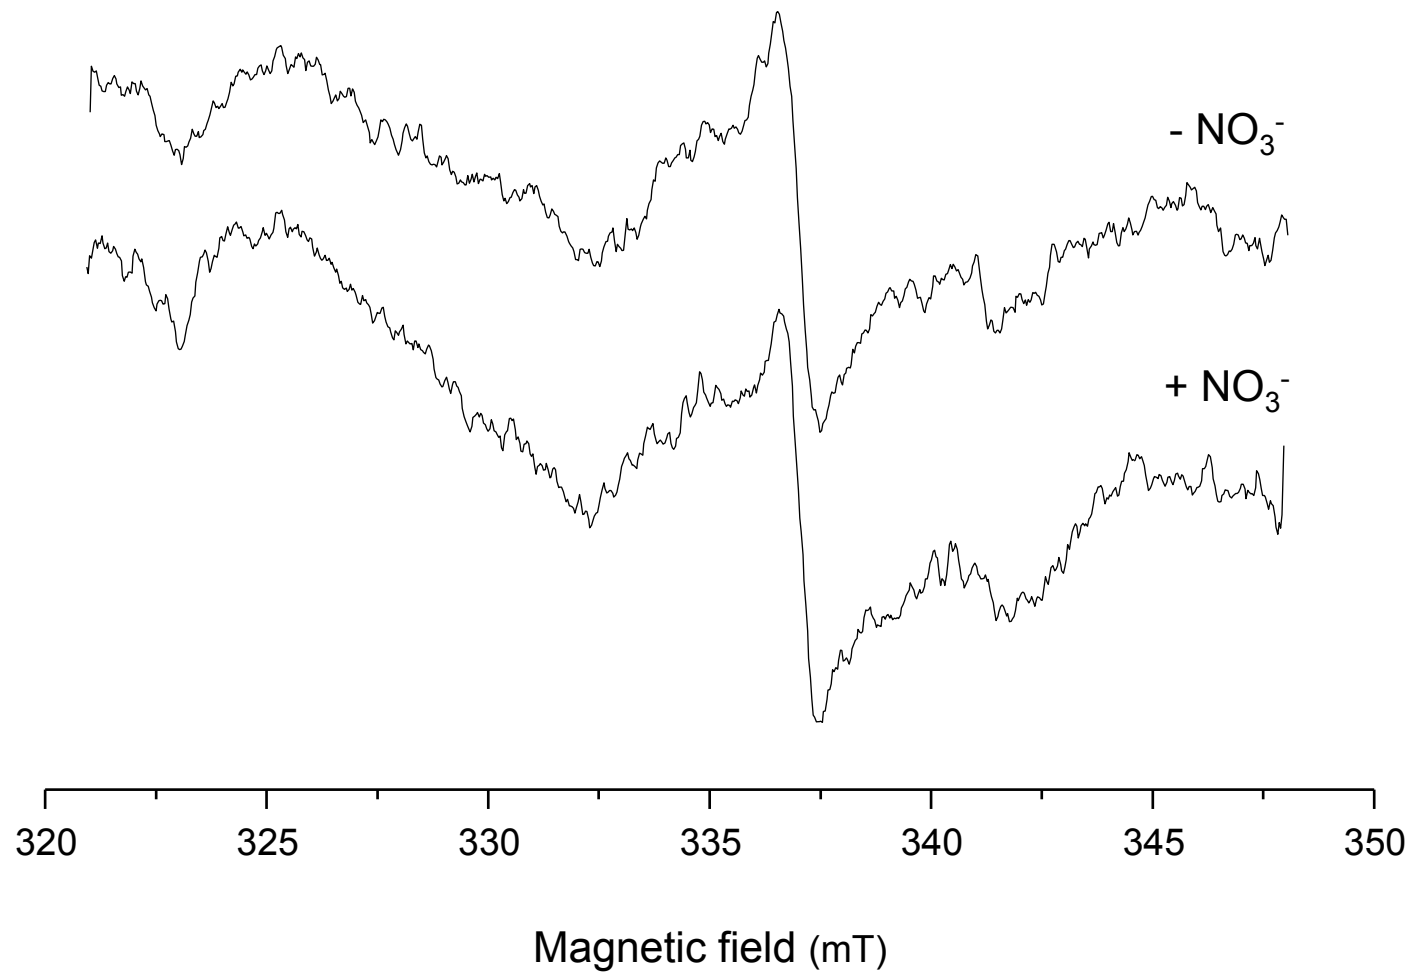

**Figure S4.** EPR spectra of intact nodules from bean plants treated or not with 10 mM KNO<sub>3</sub>. Note that the Lb<sup>2+</sup>NO signal is absent and that the shoulders at 324 mT and 342 mT are associated with the Mn<sup>2+</sup> signal (Supplementary Fig. S3).

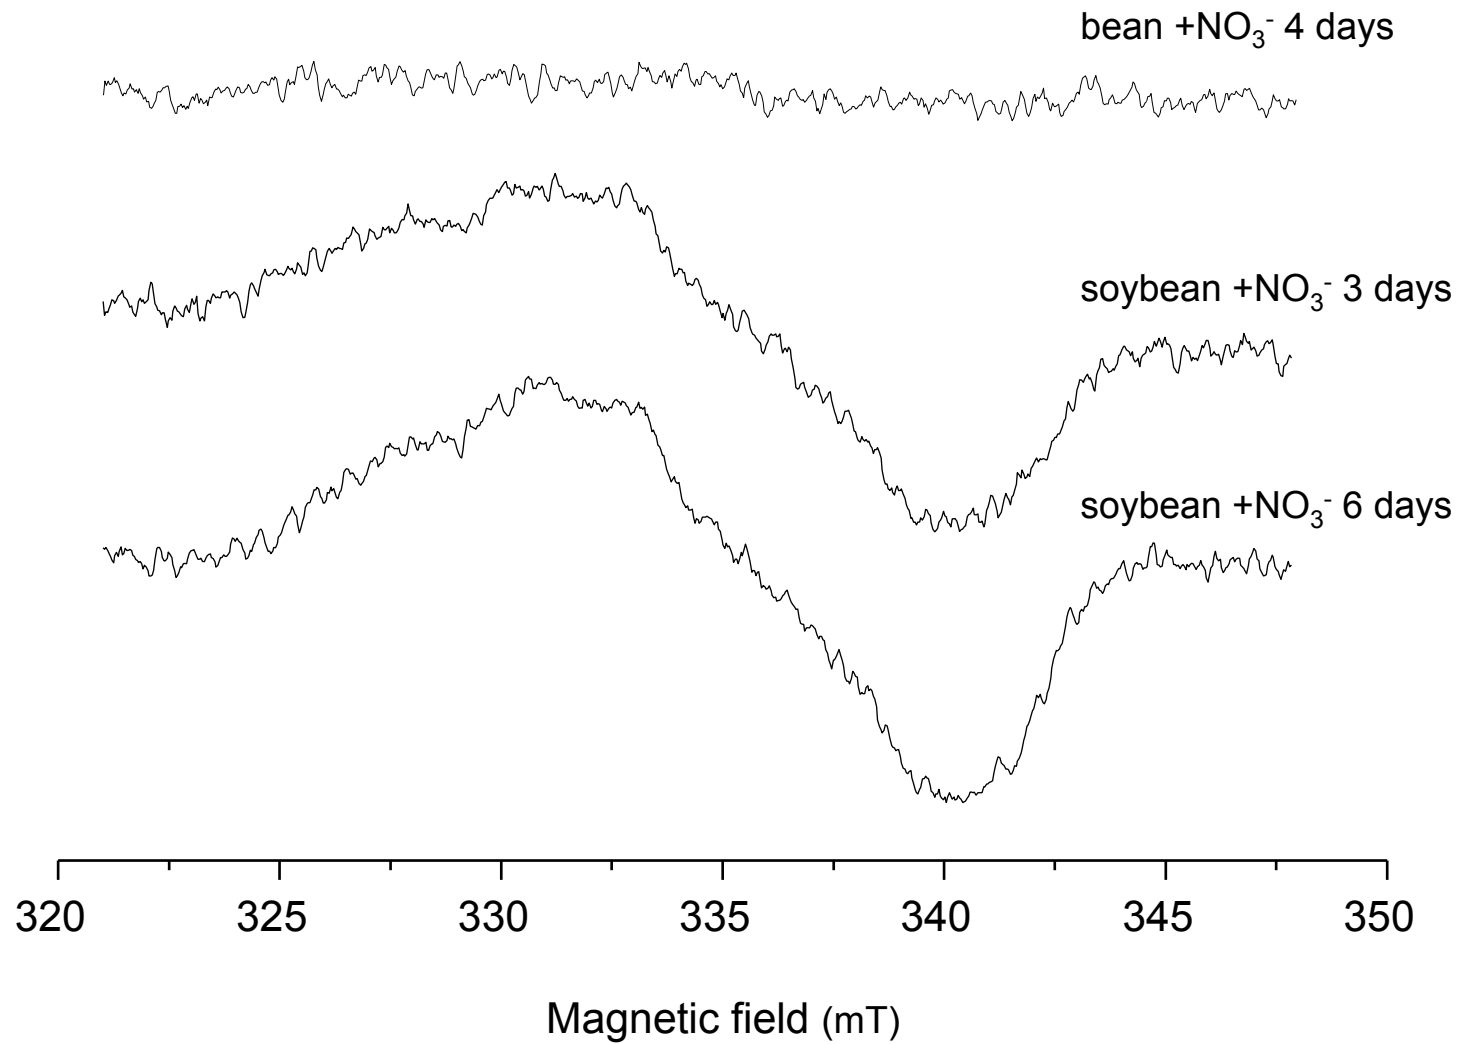

**Figure S5. EPR spectra of soluble extracts from bean and soybean nodules.** Plants were treated with 10 mM KNO<sub>3</sub> for the indicated times.

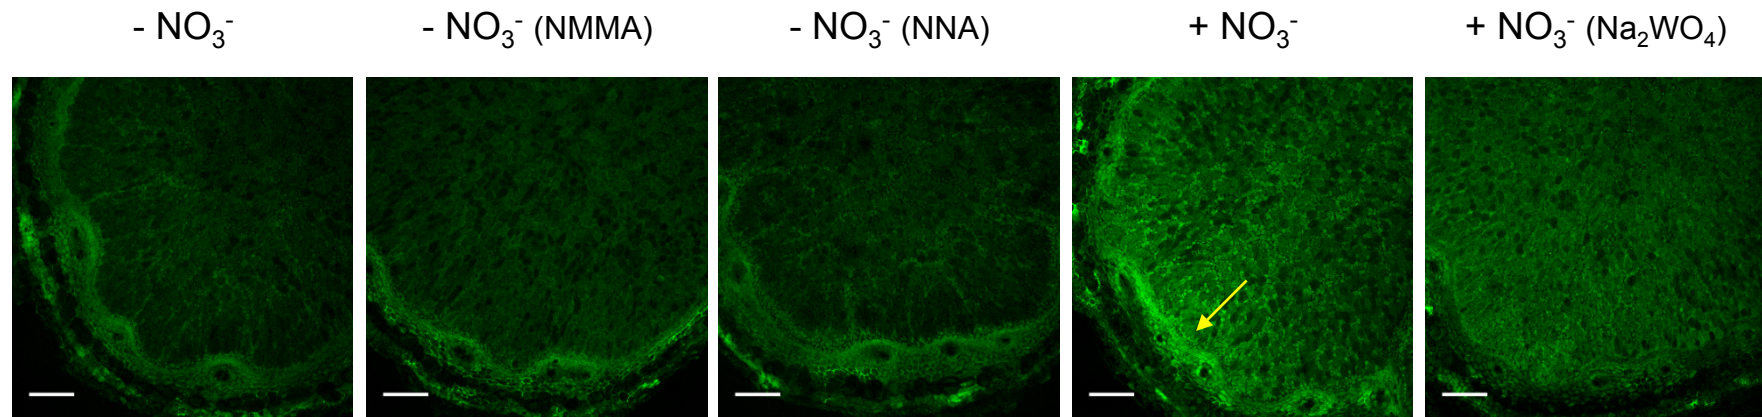

**Figure S6. Effect of enzyme inhibitors on NO production in soybean nodules.** Plants were treated or not with 10 mM KNO<sub>3</sub> for six days. Representative images of nodule sections incubated with the NO synthase inhibitors L-NMMA and L-NNA (1 mM, 1 h) or with the NR inhibitor Na<sub>2</sub>WO<sub>4</sub> (5 mM, 2 h) are shown. Note the inhibition of NO signal with Na<sub>2</sub>WO<sub>4</sub> in the infected zone and nodule parenchyma (arrow). Bars, 200 μm.
